# Supplementary material
Source: Springer Nature journal article supplement (https://www.springermedizin.de/resource/supplementary/12885_2012_3307_MOESM1_ESM.pdf/9463702)

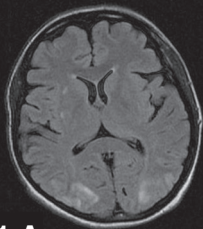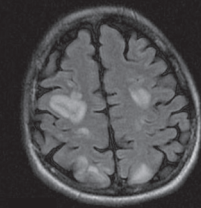

1.A

1.B

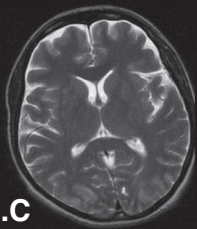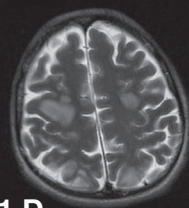

1.C

1.D

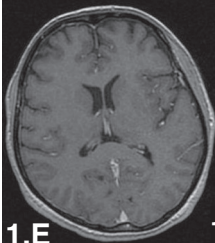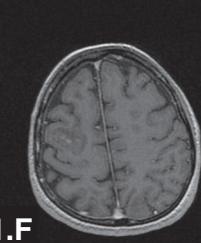

1.E

1.F

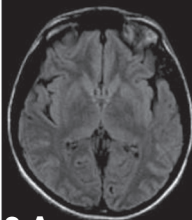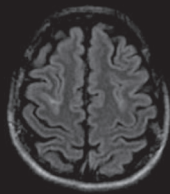

2.A

2.B

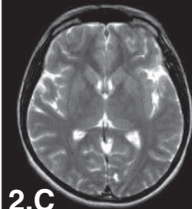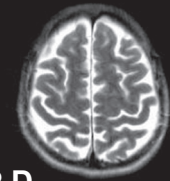

2.C

2.D

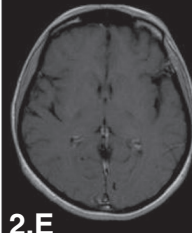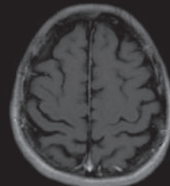

2.E

2.F

Supplement: MOESM1 [file 9463702]
